# Supplementary material
Source: PubMed Central journal article supplement (PMC2782291)
Supplement: tpc.109.070458_1.pdf [file tpc.109.070458_1.pdf]

Supplemental Data. Stahle et al. (2009). YABBYs and the transcriptional co-repressors LEUNIG and LEUNIG HOMOLOG maintain leaf polarity and meristem activity in *Arabidopsis*.

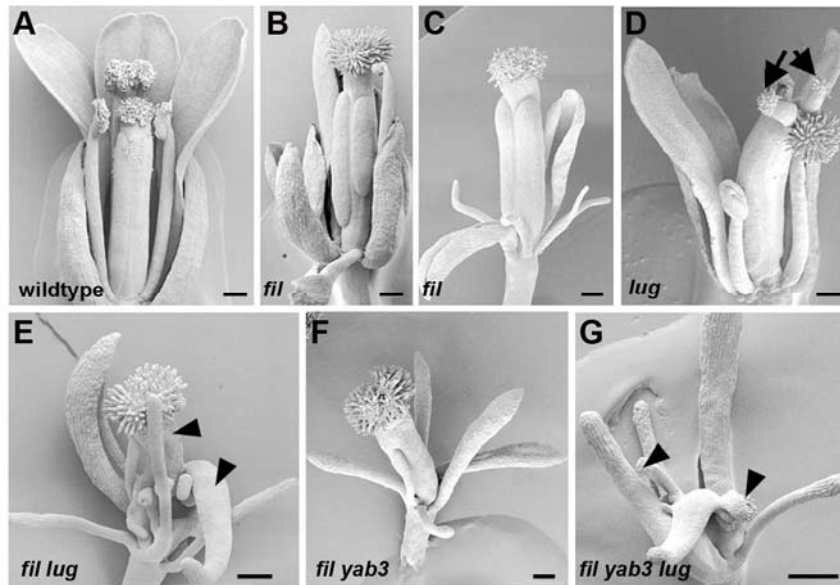

**Supplemental Figure 1. Floral phenotypes of *fil lug* and *fil yab3 lug* mutants.**

(A) to (G) Representative flowers from wild type (A), *fil-8* ([B] and [C]), *lug-1* (D), *fil-8 lug-1* (E), *fil-8 yab3-2* (F) and *fil-8 yab3-2 lug-1* (G) plants. Note several outer whorl organs have been removed from (A) and (D). Stigmatic horns that are a characteristic feature of *lug* flowers are indicated with arrows in (D). Splitting of the gynoecium caused by enhanced patterning defects of *fil-8 yab3-2* and *fil-8 yab3-2 lug-1* carpels is indicated with arrowheads in (E) and (G).

Bar = 100 $\mu$ m.

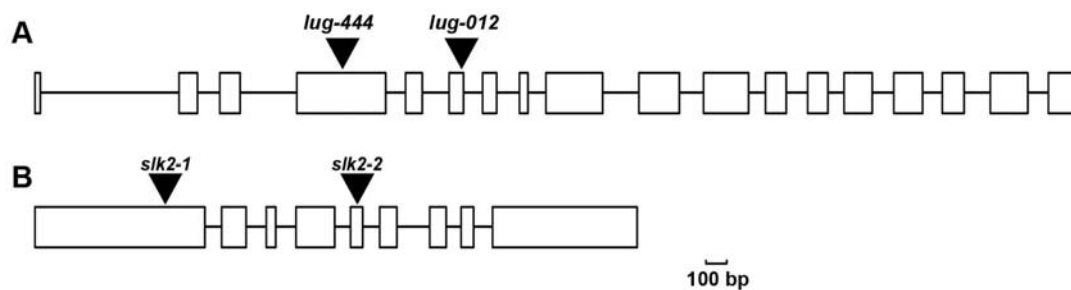

**Supplemental Figure 2. Structure of T-DNA insertion alleles used in this study.**

Schematic diagram of the *LUG* (A) and *SLK2* (B) genes. Boxes represent exons and lines represent introns. The positions of T-DNA insertions are indicated with arrowheads (see methods for details).

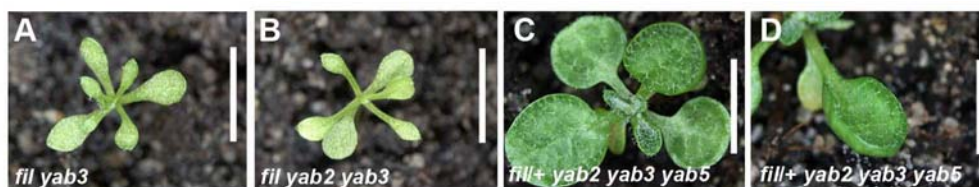

**Supplemental Figure 3. Vegetative phenotypes of *yab* mutants.**

(A) to (C) 16-day-old *fil-8 yab3-2* (A), *fil-8 yab2-1 yab3-2* (B) and 28-day-old *fil-8/+ yab2-1 yab3-2 yab5-1* (C) plant.

(D) Side view of a *fil-8/+ yab2-1 yab3-2 yab5-1* leaf.

Bar = 0.5cm.

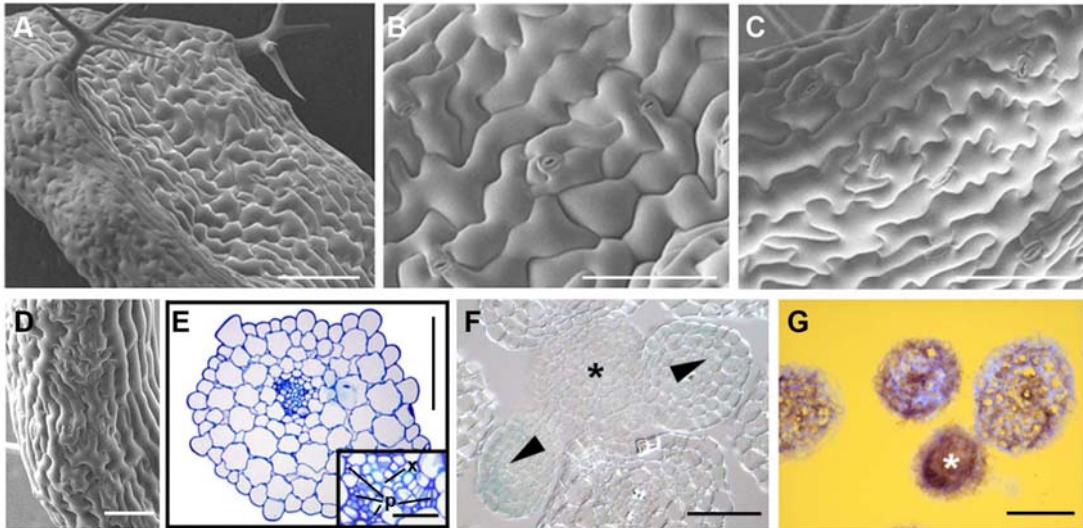

**Supplemental Figure 4. Polarity defects of *fil yab3 lug luh/+* leaves.**

(A) to (C) Adaxial ([A] and [B]) and abaxial (C) epidermis of narrow *fil-8 yab3-2 lug-1 luh-4/+* leaves.

(D) SEM of a *fil-8 yab3-2 lug-1 luh-4/+* needle showing a patch of abaxial like cells (arrow) amongst rectangular epidermal cells.

(E) Transverse section through a *fil-8 yab3-2 lug-1 luh-4/+* needle. Inset: vasculature of leaf shown in (E) with phloem partially surrounding xylem.

(F) Histochemical localization of GUS activity in a transverse section through a *fil-8 yab3-2 lug-1 luh-4/+* apex. Arrowhead indicates faint GUS staining and asterisk indicates SAM.

(G) RNA *in situ* hybridisation detects ectopic *PHB* expression in the abaxial domain of *fil-8 yab3-2 lug-1 luh-4/+* leaves.

p, phloem; x, xylem. Bar = 100  $\mu\text{m}$  in (A) to (E), 50  $\mu\text{m}$  in (F) and (G) and 20  $\mu\text{m}$  in the inset in (E).

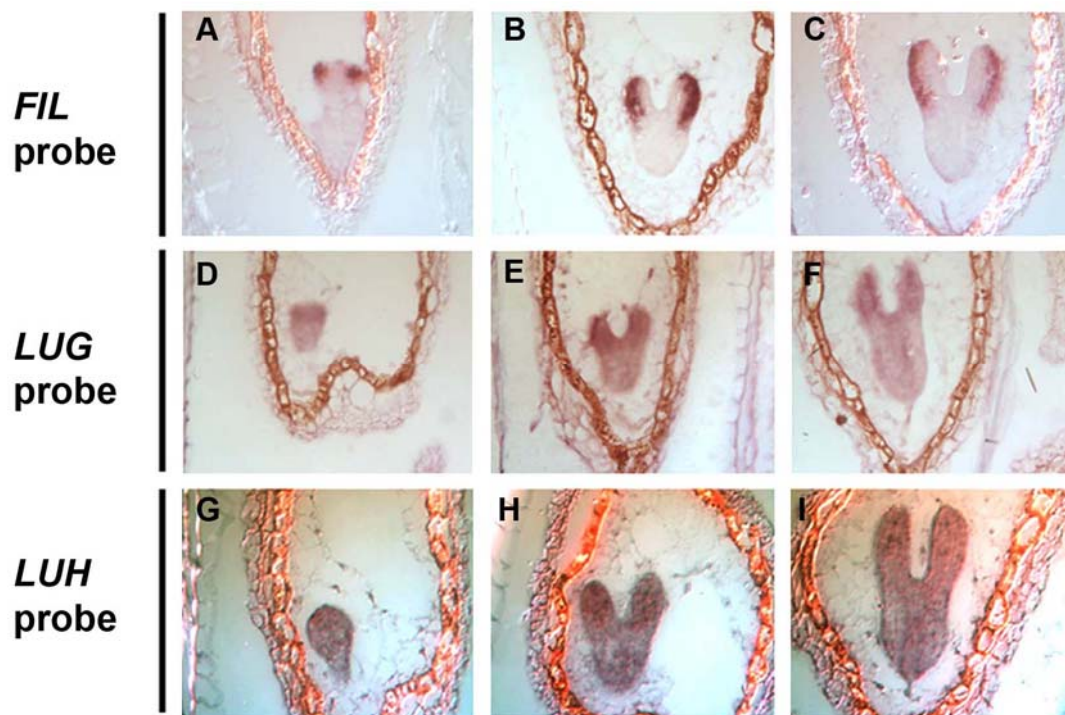

**Supplemental Figure 5. RNA *in situ* hybridisation showing the pattern of *FIL*, *LUG* and *LUH* expression in wildtype embryos.**

(A) to (I) Expression of *FIL* ([A] to [C]), *LUG* ([D] to [F]) and *LUH* ([G] to [I]) in embryos at the globular ([A], [D] and [G]), heart ([B], [E] and [H]) and torpedo ([C], [F] and [I]) stage of development.

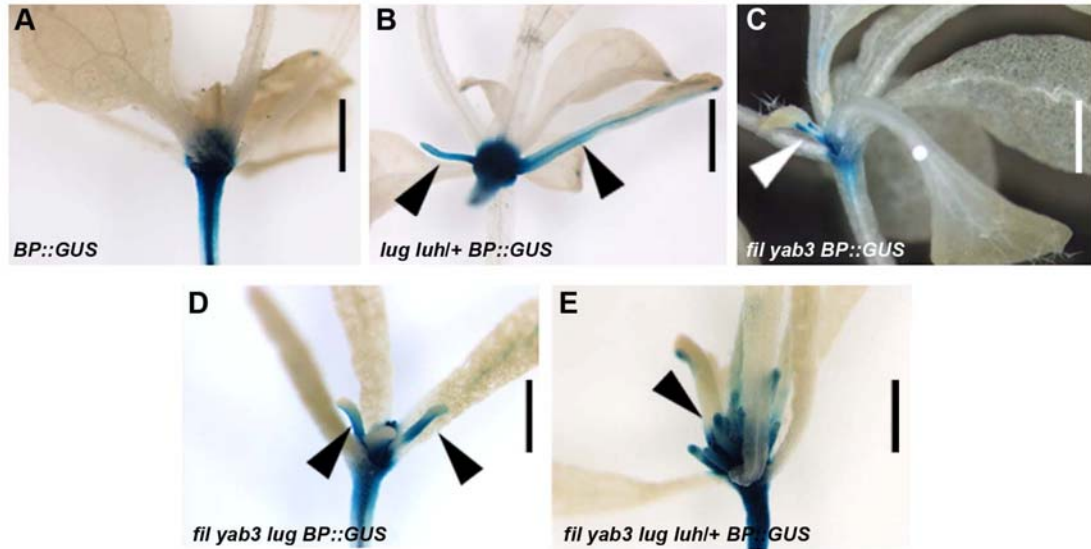

**Supplemental Figure 6. Ectopic *KNOX* expression in mutants.**

(A) Histochemical localization of GUS activity in  $BP_{pro}:GUS$  plants shows that *BP* expression is confined to the shoot apex.

(B) and (C) Ectopic *BP* expression in leaves of  $lug-444\ luh-2/+ BP_{pro}:GUS$  (B),  $fil-5\ yab3-1\ BP_{pro}:GUS$  (C),  $fil-5\ yab3-1\ lug-1\ BP_{pro}:GUS$  (D) and  $fil-5\ yab3-1\ lug-444\ luh-4/+ BP_{pro}:GUS$  (E) plants as indicated with arrowheads.

Scale = 1mm

**Supplemental Table 1. Defining the dimerization domain of FIL.**

|     | DB | Empty          | FIL 1-229<br>(Full length) | FIL 1-109<br>(Zn finger) | FIL 1-146<br>(Zn + P-rich) | FIL 120-229<br>(YABBY) |
|-----|----|----------------|----------------------------|--------------------------|----------------------------|------------------------|
| AD  |    |                |                            |                          |                            |                        |
| LUG |    | - <sup>a</sup> | +                          | +                        | +                          | -                      |

<sup>a</sup>  $\alpha$ -Gal assay measuring activity of the LacZ reporter in three separate samples. Colour change after 4 hrs (++), colour change after 24 hrs (+) and no colour change after 24 hrs (-).

**Supplemental Table 2. Interactions between SEU, SLK and the co-repressors LUG and LUH in yeast.**

| AD<br>DB | Empty          | SEU | SLK1 | SLK2 | SLK3 |
|----------|----------------|-----|------|------|------|
| LUG      | - <sup>a</sup> | ++  | ++   | ++   | +    |
| LUH      | -              | +   | +    | ++   | ++   |

<sup>a</sup>  $\alpha$ -Gal assay measuring activity of the LacZ reporter in three separate samples. Colour change after 4 hrs (++) , colour change after 24 hrs (+) and no colour change after 24 hrs (-).



**Supplemental Table 3. Dimensions of wildtype and mutant leaves.**

| Genotype                  | # of plants <sup>a</sup> | width <sup>b</sup>         | length <sup>c</sup>        |
|---------------------------|--------------------------|----------------------------|----------------------------|
| <i>Ler</i>                | 17(5)                    | 10.2 ± 0.27                | 22.7 ± 0.80                |
| <i>fil-8</i>              | 20(5)                    | 8.89 ± 0.24 <sup>d</sup>   | 19.7 ± 0.61 <sup>d</sup>   |
| <i>lug-1</i>              | 23(5)                    | 9.42 ± 0.21 <sup>d</sup>   | 25.4 ± 0.6 <sup>d</sup>    |
| <i>fil-8 lug-1</i>        | 19(5)                    | 7.79 ± 0.17 <sup>d,e</sup> | 17.2 ± 0.47 <sup>d,e</sup> |
| <i>fil-8 yab3-2</i>       | 20(5)                    | 3.44 ± 0.08 <sup>d</sup>   | 10.2 ± 0.32 <sup>d</sup>   |
| <i>fil-8 yab3-2 lug-1</i> | 20(5)                    | 2.09 ± 0.08 <sup>d,f</sup> | 9.45 ± 0.31 <sup>d</sup>   |
| <i>Col</i>                | 20(8)                    | 14.2 ± 0.16                | 44.8 ± 0.64                |
| <i>lug-444</i>            | 14(8)                    | 13.9 ± 0.27 <sup>d</sup>   | 42.4 ± 1.1                 |
| <i>luh-3</i>              | 20(8)                    | 13.3 ± 0.18 <sup>d</sup>   | 39.5 ± 0.82 <sup>d</sup>   |
| <i>lug-444 luh-3/+</i>    | 19(8)                    | 9.3 ± 0.31 <sup>d</sup>    | 30.5 ± 0.95 <sup>d</sup>   |
| <i>Col er</i>             | 10(8)                    | 12.4 ± 0.03                | 27.6 ± 0.06                |
| <i>yab2-1</i>             | 8(8)                     | 11.4 ± 0.03                | 25.8 ± 0.06                |
| <i>yab5-1</i>             | 10(8)                    | 10.3 ± 0.02 <sup>g</sup>   | 16.5 ± 0.04 <sup>g</sup>   |

<sup>a</sup> a fully mature leaf from either the 5<sup>th</sup> or 8<sup>th</sup> node, indicated (5) or (8) respectively, was measured per plant.

<sup>b</sup> measurements taken from widest point of the leaf, values are in mm ± SE.

<sup>c</sup> as measured from the leaf tip to base of petiole.

<sup>d</sup> values are significantly different from wildtype (Student's t-test, P<0.05).

<sup>e</sup> values are significantly different from *fil* and from *lug* (Student's t-test, P<0.05).

<sup>f</sup> values are significantly different from *fil yab3* (Student's t-test, P<0.05).

<sup>g</sup> values are significantly different from *Col er* (Student's t-test, P<0.001).

**Supplemental Table 4. Plant material used in this study.**

| Allele                           | Background    | Reference                                |
|----------------------------------|---------------|------------------------------------------|
| <i>fil-5</i>                     | <i>Ler</i>    | Chen <i>et al.</i> , 1999                |
| <i>fil-8</i>                     | <i>Ler</i>    | Kumaran <i>et al.</i> , 2002             |
| <i>lug-1</i>                     | <i>Ler</i>    | Liu and Meyerowitz, 1995                 |
| <i>lug-3</i>                     | <i>Ler</i>    | Liu and Meyerowitz, 1995                 |
| <i>lug-444</i>                   | Col           | SALK_126444, Alonso <i>et al.</i> , 2003 |
| <i>lug-012</i>                   | Col           | SALK_113012, Alonso <i>et al.</i> , 2003 |
| <i>luh-1</i>                     | Col <i>er</i> | Sitaraman <i>et al.</i> , 2008           |
| <i>luh-3</i>                     | Col           | Sitaraman <i>et al.</i> , 2008           |
| <i>luh-4</i>                     | Col           | SALK_097509, Alonso <i>et al.</i> , 2003 |
| <i>seu-2</i>                     | <i>Ler</i>    | Franks <i>et al.</i> , 2002              |
| <i>seu-4</i>                     | Col           | Pflugger and Zambryski, 2004             |
| <i>slk2-1</i>                    | Col           | SALK_089954, Alonso <i>et al.</i> , 2003 |
| <i>slk2-2</i>                    | Col           | SALK_093829, Alonso <i>et al.</i> , 2003 |
| <i>yab2-1</i>                    | Col <i>er</i> | CS93680, Till <i>et al.</i> , 2006       |
| <i>yab3-1</i>                    | Ws            | Siegfried <i>et al.</i> , 1999           |
| <i>yab3-2</i>                    | <i>Ler</i>    | Kumaran <i>et al.</i> , 2002             |
| <i>yab5-1</i>                    | Col <i>er</i> | CS90062, Till <i>et al.</i> , 2006       |
| <i>BP<sub>pro</sub>:GUS</i>      | Col           | Ori <i>et al.</i> , 2000                 |
| <i>CLV3<sub>pro</sub>:YFP-ER</i> | <i>Ler</i>    | Lenhard and Laux, 2003                   |
| <i>CYCBI<sub>pro</sub>:GUS</i>   | Col           | Doerner <i>et al.</i> , 1996             |

**Supplemental Table 5. RT-PCR primers used in this study.**

| Name      | Primer sequence 5'>3'         |
|-----------|-------------------------------|
| SEU-QF1   | AGCAGAGAAACACGAACAGG          |
| SEU-QR1   | CTGGTCCTTCTCCTCAGCAA          |
| SLK3Y2H-F | CCGGAATTCATGCAGAGGAGCAGTGGCAT |
| SLK1-R1   | GATGTGCTTGCCAGACTAATTG        |
| SLK2-QF1  | TGATTGACTTTTGCCGTGAC          |
| SLK2-QR1  | CTGGTAAACCTCAGATGCAGG         |
| TUB7-QF1  | CATTTGCTTCCGTACACTCAA         |
| TUB7-QR1  | CCAGGGAACCTAAGACAGCA          |
